# Supplementary material for: The effects of melatonin on bovine uniparental embryos development in vitro and the hormone secretion of COCs
Source: PeerJ. 2017 Jul 7;5:e3485. doi: 10.7717/peerj.3485 (PMC5502088; doi:10.7717/peerj.3485)
Supplement: Supplemental Information 1 — Raw data for hormone concentrations, maturation rate of oocytes, the development of parthenogenetic and androgenetic embryos, ROS of androgenetic and androgenetic embryos and the expression of steroidogenesis related genes (CYP11A1, CYP19A1 and StAR). [file peerj-05-3485-s001.xlsx]

## Sheet: hormone concentrations
Melatonin	progesterone (ng/mL)	estradiol ( pg/mL)
0 pmol/mL	0.08	1573.46
	0.06	1580.42
	0.05	1571.85
10 pmol/mL	0.14	1588.49
	0.17	1584.28
	0.13	1595.56
20 pmol/mL	0.2	1614.79
	0.24	1618.76
	0.23	1621.54
30 pmol/mL	0.35	1680.54
	0.37	1672.87
	0.33	1685.46

## Sheet: Maturation Rate of oocytes
Melatonin	No. of maturation oocytes	COCs (n)	Maturation Rate of oocytes
0 pmol∕mL	7	20	0.35
	4	19	0.210526
	13	27	0.481481
	15	24	0.625
	6	22	0.272727
	5	18	0.277778
	13	30	0.433333
	9	20	0.45
	11	26	0.423077
	14	22	0.636364
	8	23	0.347826
10 pmol∕mL	4	15	0.6667
	9	20	0.5
	15	29	0.5672
	8	23	0.4369
	7	19	0.4184
	6	17	0.4529
	7	15	0.5467
	15	31	0.4838
	21	45	0.5107
	17	31	0.5484
	20	39	0.512821
20 pmol∕mL	7	12	0.583333
	11	20	0.55
	19	32	0.59375
	13	24	0.541667
	13	20	0.65
	13	20	0.65
	13	28	0.464286
	20	37	0.540541
	8	13	0.615385
	19	34	0.558824
	10	20	0.5
30 pmol∕mL	16	23	0.695652
	13	18	0.722222
	17	24	0.695652
	12	19	0.722222
	9	14	0.708333
	11	17	0.631579
	19	30	0.642857
	25	39	0.647059
	16	24	0.633333
	14	20	0.641026
	16	25	0.666667

## Sheet: parthenogenetic embryos 
Melatonin	No. of activated oocytes	No. of cleavage oocytes	No. of morula	No. of Blastocyst
0 pmol∕mL	16	7	5	1
	17	8	6	2
	15	7	5	1
	17	9	6	2
	18	7	4	1
	20	9	7	1
	14	7	5	1
	16	5	3	0
10 pmol∕mL	18	15	11	3
	17	12	8	2
	16	11	8	2
	17	11	9	2
	15	6	4	1
	20	12	8	2
	17	12	9	3
	20	16	11	4
20 pmol∕mL	19	14	12	3
	20	15	13	3
	16	12	13	4
	17	9	6	2
	20	11	4	0
	18	13	6	2
	19	13	10	3
	20	16	12	4
30 pmol∕mL	18	13	11	3
	19	10	8	3
	17	13	10	2
	19	12	9	3
	20	11	8	2
	16	13	11	3
	18	10	8	2
	18	14	11	3

## Sheet: androgenetic embryos
Melatonin	No. of androgenetic embryos	No. of cleavage oocytes	No. of morula	No. of Blastocyst
0 pmol∕mL	34	22	6	0
	40	22	8	0
	30	14	6	0
10 pmol∕mL	32	22	10	4
	30	20	10	2
	24	18	10	2
20 pmol∕mL	39	30	14	5
	36	26	14	4
	35	28	14	3
30 pmol∕mL	32	26	12	4
	44	32	16	4
	36	28	14	4

## Sheet: ROS of parthenogenetic embryos 
Melatonin	30 pmol/mL	30 pmol/mL	30 pmol/mL
fluorescence intensity pixels	32.1553	37.3479	36.0547
fluorescence intensity pixels	33.4519	36.2488	37.1284
fluorescence intensity pixels	36.1582	35.8536	35.9668
fluorescence intensity pixels	31.3509	33.0472	39.867
fluorescence intensity pixels	35.0524	32.2524	33.4251
fluorescence intensity pixels	36.4559	35.8844	38.739
fluorescence intensity pixels	34.4486	35.6509	35.3783
fluorescence intensity pixels	32.2488	33.05	34.0446
fluorescence intensity pixels	36.6488	36.5661	33.5512
fluorescence intensity pixels	32.1507	35.3504	35.1565
fluorescence intensity pixels	35.0491	32.1493	35.9415
fluorescence intensity pixels	34.3962	37.9519	36.4842
fluorescence intensity pixels	31.3437	32.0475	31.5815
fluorescence intensity pixels	31.6816	33.6498	35.8451
fluorescence intensity pixels	30.2333	36.7459	34.4145
fluorescence intensity pixels	32.6543	33.9617	35.1542
fluorescence intensity pixels	30.2811	35.1546	36.2549
fluorescence intensity pixels	33.4728	37.4846	34.1125
fluorescence intensity pixels	34.6612	35.4419	36.5842
fluorescence intensity pixels		35.3476	37.5456
	20 pmol/mL	20 pmol/mL	20 pmol/mL
fluorescence intensity pixels	35.5853	36.3479	36.9428
fluorescence intensity pixels	37.1068	34.0478	37.336
fluorescence intensity pixels	38.1346	33.7522	37.7421
fluorescence intensity pixels	36.1118	37.0497	35.3645
fluorescence intensity pixels	35.1047	36.354	36.5556
fluorescence intensity pixels	36.1308	33.8547	36.8536
fluorescence intensity pixels	35.1191	36.252	37.1244
fluorescence intensity pixels	33.112	34.0526	37.9856
fluorescence intensity pixels	38.0827	37.5471	36.8151
fluorescence intensity pixels	35.0996	34.7455	34.2155
fluorescence intensity pixels	37.1372	35.5489	38.2552
fluorescence intensity pixels	36.1318	34.8478	38.8952
fluorescence intensity pixels	35.0849	33.2656	35.9212
fluorescence intensity pixels	36.1108	34.6946	36.5971
fluorescence intensity pixels	35.2155	32.9512	37.5217
fluorescence intensity pixels	37.7896	33.7591	37.2541
fluorescence intensity pixels	35.8654	36.2154	38.5411
fluorescence intensity pixels	38.0928	34.0214	36.5844
fluorescence intensity pixels	36.2456	35.8162	37.1545
fluorescence intensity pixels	38.1235		37.9452
	10 pmol/mL	10 pmol/mL	10 pmol/mL
fluorescence intensity pixels	39.2597	36.1707	36.5605
fluorescence intensity pixels	34.5559	32.216	37.0503
fluorescence intensity pixels	36.37	35.1714	36.7375
fluorescence intensity pixels	37.5625	34.1931	38.0888
fluorescence intensity pixels	39.2621	33.2124	36.249
fluorescence intensity pixels	37.1919	36.1542	35.8567
fluorescence intensity pixels	39.5511	37.139	37.1375
fluorescence intensity pixels	36.077	37.1767	37.4506
fluorescence intensity pixels	37.8665	36.1852	36.3421
fluorescence intensity pixels	38.0738	35.1554	37.8323
fluorescence intensity pixels	36.7701	35.2465	39.6671
fluorescence intensity pixels	42.961	35.4356	38.3536
fluorescence intensity pixels	36.2255	33.9552	36.4646
fluorescence intensity pixels	36.8924	33.2565	38.2648
fluorescence intensity pixels	35.1898	34.8795	35.2365
fluorescence intensity pixels	37.1424	33.8621	36.1247
fluorescence intensity pixels	37.6985	36.4515	39.2466
fluorescence intensity pixels	39.5892	32.2356	35.8915
fluorescence intensity pixels	38.1547	33.2622	36.5647
fluorescence intensity pixels		34.2495	37.0123
fluorescence intensity pixels			37.8655
	0 pmol/mL	0 pmol/mL	0 pmol/mL
fluorescence intensity pixels	58.8451	56.3407	57.6913
fluorescence intensity pixels	56.9559	55.7646	56.7931
fluorescence intensity pixels	55.7501	57.9492	57.3191
fluorescence intensity pixels	57.0437	58.0559	56.8513
fluorescence intensity pixels	58.4554	57.3572	57.2156
fluorescence intensity pixels	57.7533	56.6502	55.1435
fluorescence intensity pixels	58.0488	57.2765	54.8345
fluorescence intensity pixels	47.4405	56.7622	47.7014
fluorescence intensity pixels	56.9448	55.8456	56.4984
fluorescence intensity pixels	56.6454	48.1631	55.8655
fluorescence intensity pixels	56.8677	57.457	47.8415
fluorescence intensity pixels	57.0499	56.9586	55.4015
fluorescence intensity pixels	58.1247	47.6456	56.8543
fluorescence intensity pixels	55.565	57.2347	56.2467
fluorescence intensity pixels	57.4574	55.6945	54.9677
fluorescence intensity pixels	57.5465	60.9447	56.1213
fluorescence intensity pixels	56.4574	47.8546	57.1547
fluorescence intensity pixels	48.9877	57.4236	57.4846
fluorescence intensity pixels	57.2565	55.8943	56.2465
fluorescence intensity pixels	54.8655	58.8945	48.1054
fluorescence intensity pixels	57.6935	58.0134	57.8923
fluorescence intensity pixels	57.6545	57.6247	58.0243

## Sheet: ROS of androgenetic embryos
Melatonin	30 pmol/mL	30 pmol/mL	30 pmol/mL
fluorescence intensity pixels	31.2546	30.2465	28.0244
fluorescence intensity pixels	30.4987	31.3488	30.5466
fluorescence intensity pixels	33.5461	29.8922	29.1655
fluorescence intensity pixels	31.3567	28.2125	28.3125
fluorescence intensity pixels	28.6547	30.5732	27.5467
fluorescence intensity pixels	33.2165	30.5476	29.3166
fluorescence intensity pixels	30.4217	29.5487	28.255
fluorescence intensity pixels	30.5462	29.1322	30.1249
fluorescence intensity pixels	28.6946	31.6985	30.5481
fluorescence intensity pixels	28.1672	30.547	29.5183
fluorescence intensity pixels	30.2499	32.4688	28.6653
fluorescence intensity pixels	32.9247	29.1646	30.6547
fluorescence intensity pixels	34.5324	32.6965	29.5468
fluorescence intensity pixels	33.5449	30.2621	29.8461
fluorescence intensity pixels	33.5217	30.9876	30.2654
fluorescence intensity pixels	34.6333	29.3642
	20 pmol/mL	20 pmol/mL	20 pmol/mL
fluorescence intensity pixels	33.2466	31.4672	33.6547
fluorescence intensity pixels	31.4672	31.5469	34.1655
fluorescence intensity pixels	30.5352	30.5475	32.4655
fluorescence intensity pixels	34.6166	32.4313	34.0655
fluorescence intensity pixels	32.1235	29.5462	30.5119
fluorescence intensity pixels	34.5462	29.5165	29.1616
fluorescence intensity pixels	33.2316	30.5165	30.2165
fluorescence intensity pixels	32.1654	30.6985	31.4652
fluorescence intensity pixels	29.3166	29.5165	33.1655
fluorescence intensity pixels	31.4658	30.2167	30.4652
fluorescence intensity pixels	29.4657	28.2546	29.1655
fluorescence intensity pixels	33.4832	31.2647	30.5917
fluorescence intensity pixels	31.1657	32.2646	31.2465
fluorescence intensity pixels	30.5466	30.2659	30.1565
fluorescence intensity pixels	33.1762	32.5167	33.1565
fluorescence intensity pixels	33.8465	33.5168
	10 pmol/mL	10 pmol/mL	10 pmol/mL
fluorescence intensity pixels	33.1565	34.2566	33.5136
fluorescence intensity pixels	31.2655	33.5247	34.5765
fluorescence intensity pixels	29.4547	32.5465	33.5469
fluorescence intensity pixels	33.1655	31.5137	32.8516
fluorescence intensity pixels	30.5457	33.5138	34.8546
fluorescence intensity pixels	31.5465	34.8945	33.5155
fluorescence intensity pixels	33.4655	33.5423	32.5168
fluorescence intensity pixels	30.4517	31.5646	33.6142
fluorescence intensity pixels	31.4217	34.4652	32.4565
fluorescence intensity pixels	29.4535	33.8246	34.1658
fluorescence intensity pixels	30.4574	35.5135	30.1567
fluorescence intensity pixels	28.1567	31.5325	29.4657
fluorescence intensity pixels	31.1275	33.2246	30.5167
fluorescence intensity pixels	32.4655	34.5325	31.5547
fluorescence intensity pixels	28.5465	32.5645	29.5137
fluorescence intensity pixels	30.4517		32.1343
	0 pmol/mL	0 pmol/mL	0 pmol/mL
fluorescence intensity pixels	50.4614	49.5647	47.4685
fluorescence intensity pixels	46.5465	45.5642	49.5462
fluorescence intensity pixels	45.5342	46.3457	49.5762
fluorescence intensity pixels	44.5465	47.5347	46.5676
fluorescence intensity pixels	43.1655	47.2654	47.5675
fluorescence intensity pixels	47.5417	48.2435	48.0132
fluorescence intensity pixels	48.2417	50.2438	50.4614
fluorescence intensity pixels	47.5458	48.5316	49.5648
fluorescence intensity pixels	46.5455	45.2643	48.5317
fluorescence intensity pixels	45.249	48.2685	49.0157
fluorescence intensity pixels	45.5485	47.6547	48.2468
fluorescence intensity pixels	43.5456	47.5654	49.2498
fluorescence intensity pixels	46.1435	47.1325	47.5462
fluorescence intensity pixels	47.5455	46.2485	52.5247
fluorescence intensity pixels	48.2465	49.5465	48.4165
fluorescence intensity pixels	49.5344	46.1235

## Sheet: CYP19A1
melatonin	Ct value of CYP19A1	Ct value of β-actin
0	32.7655	16.0247
0	31.7549	14.9286
0	32.429	15.7461
10pmol∕mL	31.8695	15.3339
10pmol∕mL	31.9558	15.4664
10pmol∕mL	31.7685	15.3498
20pmol∕mL	30.6458	14.3459
20pmol∕mL	31.0827	15.1143
20pmol∕mL	30.3591	14.4094
30pmol∕mL	30.7748	14.7653
30pmol∕mL	30.5238	14.9773
30pmol∕mL	30.8645	15.237

## Sheet: CYP11A1
melatonin	Ct value of CYP11A1	Ct value of β-actin
0	23.5799	15.1595
0	22.6846	14.3817
0	23.2569	14.7494
10pmol∕mL	22.4547	14.6725
10pmol∕mL	22.7592	14.7844
10pmol∕mL	23.852	15.8836
20pmol∕mL	25.3846	17.7161
20pmol∕mL	21.382	13.8427
20pmol∕mL	22.2121	14.6407
30pmol∕mL	23.5868	16.4164
30pmol∕mL	23.3423	16.3242
30pmol∕mL	21.7545	14.5593

## Sheet: StAR
melatonin	Ct value of StAR	Ct value of β-actin
0	19.9161	14.133
0	20.2047	14.4864
0	20.1136	14.2983
10pmol∕mL	19.9792	14.6695
10pmol∕mL	20.4747	15.2688
10pmol∕mL	20.5626	15.4999
20pmol∕mL	21.3346	16.5996
20pmol∕mL	20.3625	15.4436
20pmol∕mL	19.0944	14.5654
30pmol∕mL	20.5721	16.2944
30pmol∕mL	21.0363	16.807
30pmol∕mL	19.8604	15.2476
